# Supplementary material for: Feasibility of automated body trait determination using the SR4K time-of-flight camera in cow barns
Source: Springer Nature journal article supplement (doi:10.1186/2193-1801-3-225), 2014-05-03

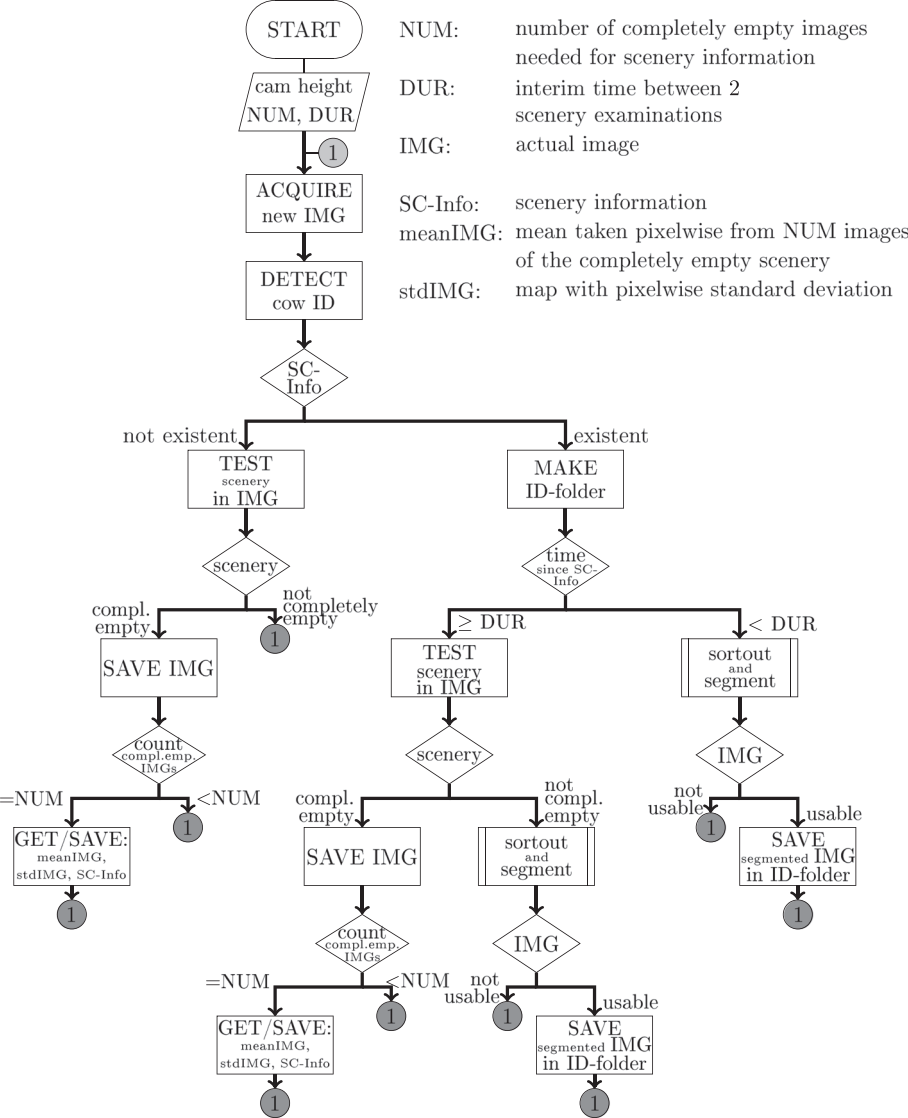

Supplement: 40064_2013_1546_MOESM1_ESM.pdf [file 40064_2013_1546_MOESM1_ESM.pdf]
