# Supplementary material for: Feasibility of automated body trait determination using the SR4K time-of-flight camera in cow barns
Source: Springer Nature journal article supplement (doi:10.1186/2193-1801-3-225), 2014-05-03
Supplement: 40064_2013_1546_MOESM3_ESM.pdf [file 40064_2013_1546_MOESM3_ESM.pdf]

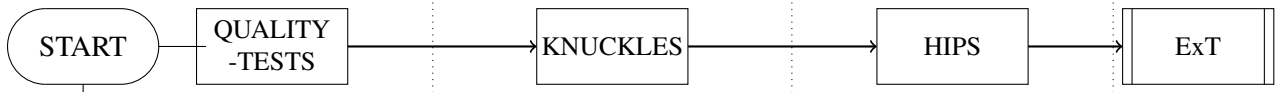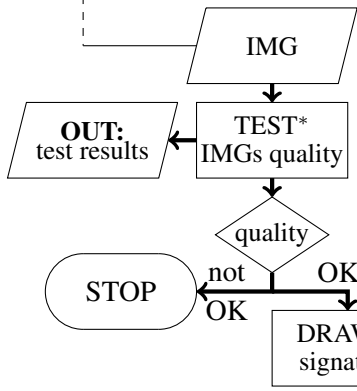

\*: ImageBorder, HindBoundaryCurve  
 \*\*: distances: center of gravity to hind boundary curve  
 \*: possible dishes classifications: flat-flat, flat-deep, deep-flat, deep-deep

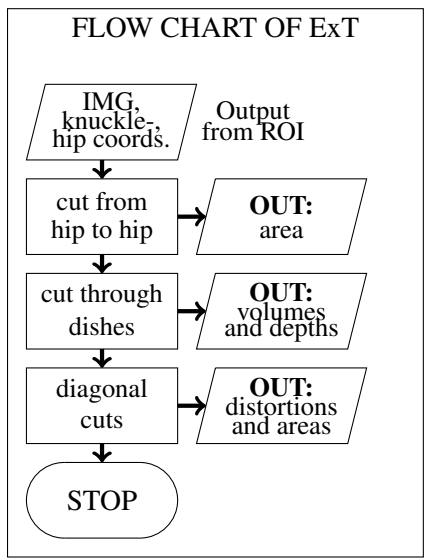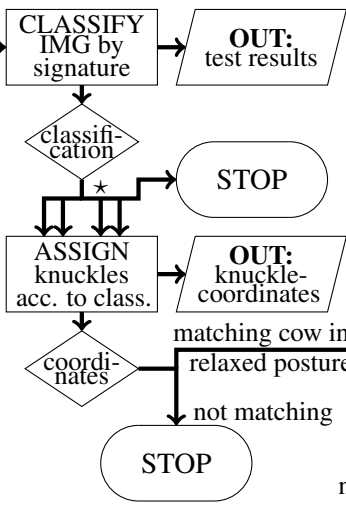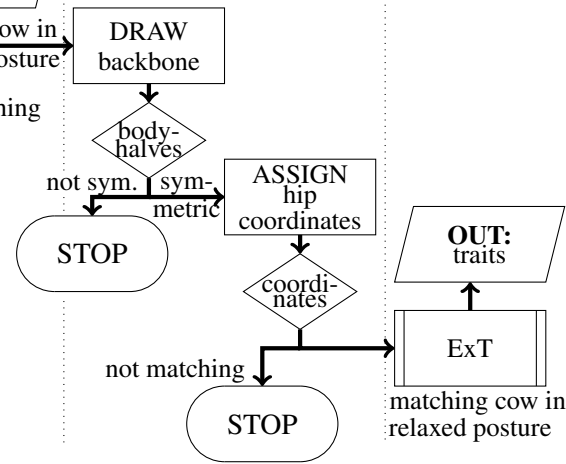

matching cow in relaxed posture
