# Supplementary material for: Feasibility of automated body trait determination using the SR4K time-of-flight camera in cow barns
Source: Springer Nature journal article supplement (doi:10.1186/2193-1801-3-225), 2014-05-03

Segmented Depth Map, HF Cow

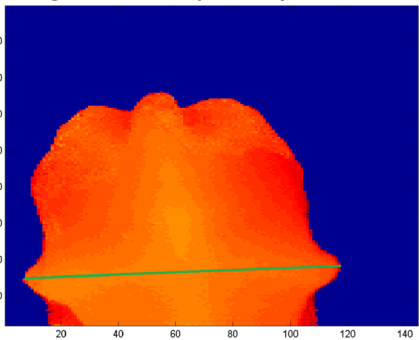

Height Profile Hip to Hip, HF Cow

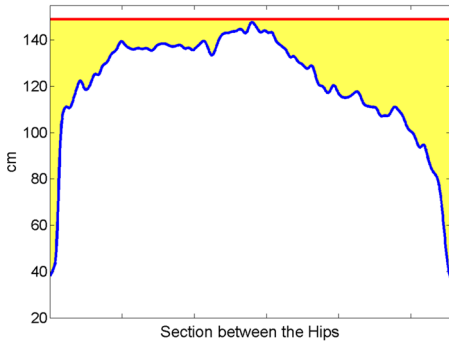

Segmented Depth Map, FV Cow

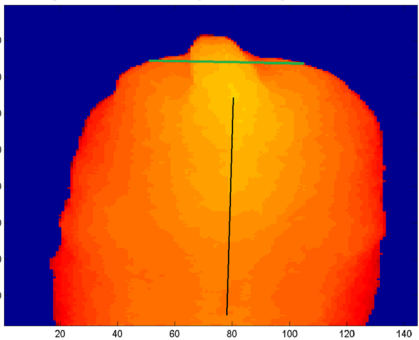

Height Profile Tail Head, FV cow

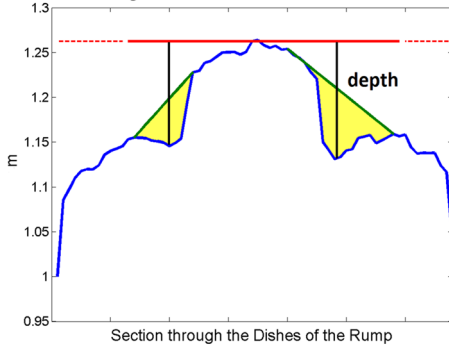

Segmented Depth Map, HF Cow

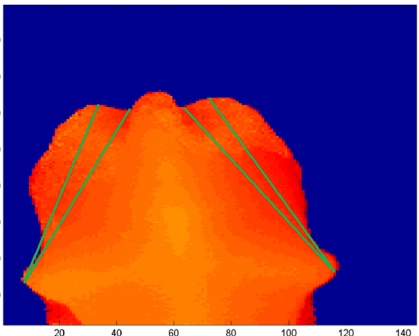

Height Profile Hip to Dish, HF cow

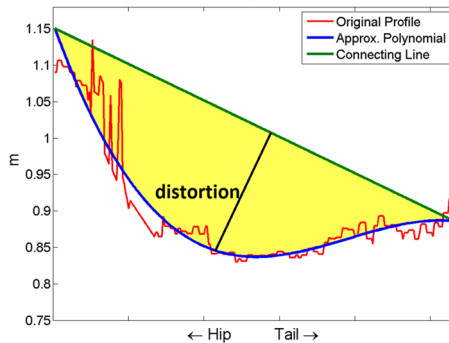

Supplement: 40064_2013_1546_MOESM9_ESM.pdf [file 40064_2013_1546_MOESM9_ESM.pdf]
